# Supplementary material for: Identification of biomolecule-based electronic materials from a first-principles study of aliphatic amino acids
Source: Royal Society of Chemistry journal article supplement (doi:10.1039/d2cp05333k), 2023-01-01
Supplement: d2cp05333k1.pdf [file d2cp05333k1.pdf]

## Supporting Information

Identification of biomolecule-based electronic materials from a first-principles study of aliphatic amino acids

### Table of Contents

#### Figures and Tables

Fig. S1 Directions of the minimal and maximal Young's modulus value for L-Val, L-Leu, and L-Met

Table S1: Calculated dielectric tensor  $\epsilon_{ij}$  for L-Val, L-Leu, and L-Met

Table S2: Calculated piezoelectric stress tensor  $e_{ij}$  for L-Val, L-Leu, and L-Met

Table S3: Calculated piezoelectric strain tensor  $d_{ij}$  for L-Val

Table S4: Calculated piezoelectric voltage tensor  $g_{ij}$  for L-Val, L-Leu, and L-Met

Table S5: Calculated elastic stiffness tensor  $C_{ij}$  for L-Val

Table S6: Calculated elastic compliance tensor  $S_{ij}$  for L-Val, L-Leu, and L-Met

Table S7: Calculated elastic constants for L-Val

Table S8: Calculated elastic constants for L-Leu

Table S9: Calculated elastic constants for L-Met

Table S10 Analysis of the unit cell parameters of three amino acids crystals calculated with and without dispersion corrections.

Table S11 Analysis of the unit cell parameters of three amino acids crystals calculated with conventional DFT and MP2 method.

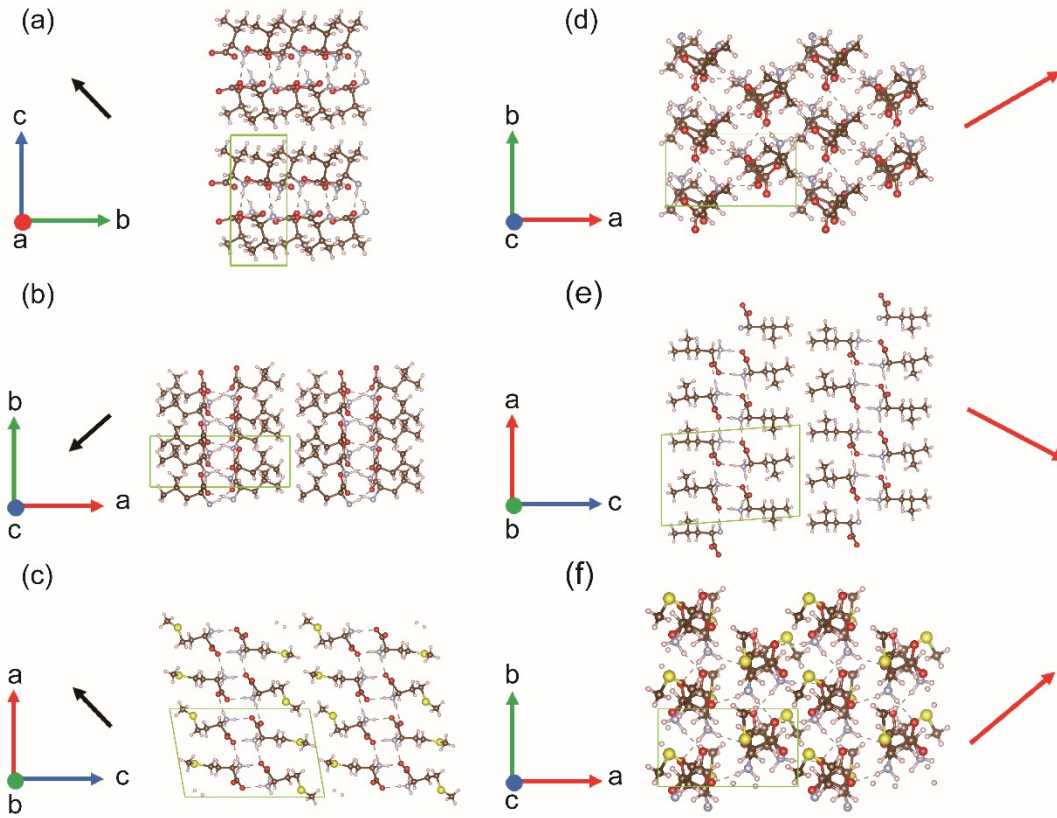

**Fig. S1** Directions of the minimal (black arrow) and maximal (red arrow) Young's modulus value of L-Val, L-Leu, and L-Met. Projection of L-Val along (a) a-axis and (d) c-axis. Projection of L-Leu along (b) c-axis and (e) b-axis. Projection of L-Met along (c) b-axis and (f) c-axis.

**Table S1** Calculated dielectric tensor  $\epsilon_{ij}$  of L-Val, L-Leu, and L-Met

$$\epsilon_{ij\_L-Val} = \begin{bmatrix} 2.616 & 0 & 0.103 \\ 0 & 2.676 & 0 \\ 0.103 & 0 & 2.498 \end{bmatrix}$$

$$\epsilon_{ij\_L-Leu} = \begin{bmatrix} 2.325 & 0 & 0.083 \\ 0 & 2.409 & 0 \\ 0.083 & 0 & 2.298 \end{bmatrix}$$

$$\epsilon_{ij\_L-Met} = \begin{bmatrix} 2.754 & 0 & 0.234 \\ 0 & 2.730 & 0 \\ 0.234 & 0 & 3.291 \end{bmatrix}$$

**Table S2** Calculated piezoelectric stress tensor  $e_{ij}$  of L-Val, L-Leu, and L-Met (C/m<sup>2</sup>)

$$\mathbf{e}_{ij\_L-Val} = \begin{bmatrix} 0 & 0 & 0 & -0.044 & 0 & -0.004 \\ -0.123 & -0.253 & 0.024 & 0 & -0.029 & 0 \\ 0 & 0 & 0 & -0.009 & 0 & -0.029 \end{bmatrix}$$

$$\mathbf{e}_{ij\_L-Leu} = \begin{bmatrix} 0 & 0 & 0 & 0.500 & 0 & -0.639 \\ 0.107 & -0.214 & -0.109 & 0 & 0.165 & 0 \\ 0 & 0 & 0 & -0.279 & 0 & -0.279 \end{bmatrix}$$

$$\mathbf{e}_{ij\_L-Met} = \begin{bmatrix} 0 & 0 & 0 & -0.070 & 0 & 0.016 \\ 0.202 & 0.201 & 0.046 & 0 & 0.022 & 0 \\ 0 & 0 & 0 & -0.103 & 0 & 0.071 \end{bmatrix}$$

**Table S3** Calculated piezoelectric strain tensor  $d_{ij}$  of L-Val (pm/V)

$$\mathbf{d}_{ij\_L-Val} = \begin{bmatrix} 0 & 0 & 0 & -9.486 & 0 & -1.985 \\ -0.180 & 7.26 & 3.931 & 0 & -4.580 & 0 \\ 0 & 0 & 0 & -3.030 & 0 & -2.400 \end{bmatrix}$$

$$\mathbf{d}_{ij\_L-Leu} = \begin{bmatrix} 0 & 0 & 0 & -56.280 & 0 & -3.050 \\ 10.124 & -15.11 & -1.860 & 0 & 41.953 & 0 \\ 0 & 0 & 0 & -23.200 & 0 & -44.060 \end{bmatrix}$$

$$\mathbf{d}_{ij\_L-Met} = \begin{bmatrix} 0 & 0 & 0 & -9.280 & 0 & -2.580 \\ 4.436 & 9.023 & -0.870 & 0 & 9.562 & 0 \\ 0 & 0 & 0 & -11.060 & 0 & -0.130 \end{bmatrix}$$

**Table S4** Calculated piezoelectric voltage tensor  $g_{ij}$  of L-Val, L-Leu, and L-Met (V mN<sup>-1</sup>)

$$\mathbf{g}_{ij\_L-Val} = \begin{bmatrix} 0 & 0 & 0 & -0.412 & 0 & -0.086 \\ -0.008 & 0.316 & 0.171 & 0 & -0.199 & 0 \\ 0 & 0 & 0 & -0.132 & 0 & -0.104 \end{bmatrix}$$

$$\mathbf{g}_{ij\_L-Leu} = \begin{bmatrix} 0 & 0 & 0 & -2.706 & 0 & -0.147 \\ 0.006 & -0.727 & -0.089 & 0 & 2.017 & 0 \\ 0 & 0 & 0 & -1.116 & 0 & -2.119 \end{bmatrix}$$

$$\mathbf{g}_{ij\_L-Met} = \begin{bmatrix} 0 & 0 & 0 & -0.358 & 0 & -0.100 \\ 0.171 & 0.348 & -0.034 & 0 & 0.369 & 0 \\ 0 & 0 & 0 & -0.427 & 0 & -0.005 \end{bmatrix}$$

**Table S5** Calculated elastic stiffness tensor  $C_{ij}$  of L-Val

$$\mathbf{C}_{ij\_L-Val} = \begin{bmatrix} 55.167 & 23.875 & 15.680 & 0 & 0.257 & 0 \\ 23.875 & 40.721 & 10.617 & 0 & -1.151 & 0 \\ 15.680 & 10.617 & 29.745 & 0 & 2.836 & 0 \\ 0 & 0 & 0 & 5.237 & 0 & -2.862 \\ 0.257 & -1.151 & 2.836 & 0 & 10.589 & 0 \\ 0 & 0 & 0 & -2.862 & 0 & 15.692 \end{bmatrix}$$

$$\mathbf{C}_{ij\_L-Leu} = \begin{bmatrix} 12.221 & 1.619 & 1.110 & 0 & -0.552 & 0 \\ 1.619 & 22.443 & 13.345 & 0 & -0.672 & 0 \\ 1.110 & 13.345 & 28.015 & 0 & -4.206 & 0 \\ 0 & 0 & 0 & 7.677 & 0 & 2.226 \\ -0.552 & -0.672 & -4.206 & 0 & 3.348 & 0 \\ 0 & 0 & 0 & 2.226 & 0 & 2.487 \end{bmatrix}$$

$$C_{ij\_L-Met} = \begin{bmatrix} 27.725 & 7.531 & 7.542 & 0 & 1.842 & 0 \\ 7.531 & 20.854 & 2.544 & 0 & -1.920 & 0 \\ 7.542 & 2.544 & 23.537 & 0 & 1.049 & 0 \\ 0 & 0 & 0 & 9.389 & 0 & -6.624 \\ 1.842 & -1.920 & 1.049 & 0 & 3.353 & 0 \\ 0 & 0 & 0 & -6.624 & 0 & 17.612 \end{bmatrix}$$

**Table S6** Calculated elastic compliance tensor  $S_{ij}$  of L-Val, L-Leu, and L-Met

$$S_{ij\_L-Val} = \begin{bmatrix} 0.026 & -0.013 & -0.009 & 0 & 0.000 & 0 \\ -0.013 & 0.034 & -0.006 & 0 & 0.006 & 0 \\ -0.009 & -0.006 & 0.042 & 0 & -0.012 & 0 \\ 0 & 0 & 0 & 0.212 & 0 & 0.039 \\ 0.000 & 0.006 & -0.012 & 0 & 0.098 & 0 \\ 0 & 0 & 0 & 0.039 & 0 & 0.071 \end{bmatrix}$$

$$S_{ij\_L-Leu} = \begin{bmatrix} 0.033 & -0.025 & 0.013 & 0 & 0.015 & 0 \\ -0.025 & 0.054 & 0.026 & 0 & 0.012 & 0 \\ 0.013 & 0.026 & -0.017 & 0 & 0.003 & 0 \\ 0 & 0 & 0 & -0.003 & 0 & 0.086 \\ 0.015 & 0.012 & 0.003 & 0 & 0.262 & 0 \\ 0 & 0 & 0 & 0.086 & 0 & 0.072 \end{bmatrix}$$

$$S_{ij\_L-Met} = \begin{bmatrix} 0.046 & -0.018 & -0.011 & 0 & -0.032 & 0 \\ -0.018 & 0.059 & -0.002 & 0 & 0.045 & 0 \\ -0.011 & -0.002 & 0.047 & 0 & -0.010 & 0 \\ 0 & 0 & 0 & 0.145 & 0 & 0.055 \\ -0.032 & 0.045 & -0.010 & 0 & 0.345 & 0 \\ 0 & 0 & 0 & 0.055 & 0 & 0.077 \end{bmatrix}$$

**Table S7** Calculated elastic constants of L-Val

| Scheme                    | Voigt  | Reuss  | Hill   |
|---------------------------|--------|--------|--------|
| Bulk Modulus $B$ (GPa)    | 25.109 | 21.850 | 23.479 |
| Shear Modulus $G$ (GPa)   | 11.334 | 9.019  | 10.177 |
| Young's Modulus $E$ (GPa) | 29.556 | 23.785 | 26.676 |
| P-wave Modulus (GPa)      | 40.221 | 33.876 | 37.048 |
| Poisson's Ratio $\nu$     | 0.304  | 0.319  | 0.311  |
| Bulk/Shear Ratio          | 2.215  | 2.423  | 2.307  |

**Table S8** Calculated elastic constants of L-Leu

| Scheme                    | Voigt  | Reuss  | Hill   |
|---------------------------|--------|--------|--------|
| Bulk Modulus $B$ (GPa)    | 10.536 | 7.614  | 9.075  |
| Shear Modulus $G$ (GPa)   | 5.809  | 3.466  | 4.638  |
| Young's Modulus $E$ (GPa) | 14.722 | 9.029  | 11.888 |
| P-wave Modulus (GPa)      | 18.282 | 12.236 | 15.259 |
| Poisson's Ratio $\nu$     | 0.267  | 0.302  | 0.282  |
| Bulk/Shear Ratio          | 1.814  | 2.197  | 1.957  |

**Table S9** Calculated elastic constants of L-Met

| Scheme                    | Voigt  | Reuss  | Hill   |
|---------------------------|--------|--------|--------|
| Bulk Modulus $B$ (GPa)    | 11.928 | 11.404 | 11.666 |
| Shear Modulus $G$ (GPa)   | 9.704  | 6.153  | 7.928  |
| Young's Modulus $E$ (GPa) | 22.901 | 15.645 | 19.392 |
| P-wave Modulus (GPa)      | 24.866 | 19.607 | 22.237 |
| Poisson's Ratio $\nu$     | 0.180  | 0.271  | 0.223  |
| Bulk/Shear Ratio          | 1.229  | 1.853  | 1.471  |

**Table S10** Analysis of the unit cell parameters of three amino acids crystals calculated with and without dispersion corrections.

|       |          | a(Å)  | b(Å)  | c(Å)   | $\beta$ (°) | $E_0$ (eV) |
|-------|----------|-------|-------|--------|-------------|------------|
| L-Val | DFT      | 9.538 | 5.176 | 11.625 | 90.704      | -436.651   |
|       | DFT-D3   | 9.453 | 5.070 | 11.204 | 90.138      | -441.271   |
|       | error    | 0.085 | 0.106 | 0.421  | 0.566       | 4.62       |
|       | error    | 0.899 | 2.091 | 3.758  | 0.628       | 1.047      |
|       | ratio(%) |       |       |        |             |            |
| L-Leu | DFT      | 9.606 | 5.324 | 14.666 | 94.060      | -507.663   |
|       | DFT-D3   | 9.357 | 5.146 | 13.978 | 94.007      | -508.406   |
|       | error    | 0.249 | 0.178 | 0.688  | 0.053       | 0.743      |
|       | error    | 2.661 | 3.459 | 4.922  | 0.056       | 0.146      |
|       | ratio(%) |       |       |        |             |            |
| L-Met | DFT      | 9.333 | 5.066 | 14.325 | 96.076      | -387.519   |
|       | DFT-D3   | 9.259 | 4.960 | 14.086 | 96.243      | -392.447   |
|       | error    | 0.074 | 0.106 | 0.239  | -0.167      | 4.928      |
|       | error    | 0.799 | 2.137 | 1.700  | 0.174       | 1.256      |
|       | ratio(%) |       |       |        |             |            |

**Table S11** Analysis of the unit cell parameters of three amino acids crystals calculated with conventional DFT and MP2 method.

|       |          | a(Å)  | b(Å)  | c(Å)   | $\beta$ (°) |
|-------|----------|-------|-------|--------|-------------|
| L-Val | DFT      | 9.538 | 5.176 | 11.625 | 90.704      |
|       | MP2      | 9.453 | 5.070 | 11.204 | 90.138      |
|       | error    | 0.085 | 0.106 | 0.421  | 0.566       |
|       | error    | 0.899 | 2.091 | 3.758  | 0.627       |
|       | ratio(%) |       |       |        |             |
| L-Leu | DFT      | 9.606 | 5.324 | 14.666 | 94.060      |
|       | MP2      | 9.357 | 5.146 | 13.978 | 94.007      |
|       | error    | 0.249 | 0.178 | 0.688  | 0.053       |
|       | error    | 2.661 | 3.459 | 4.922  | 0.056       |
|       | ratio(%) |       |       |        |             |
| L-Met | DFT      | 9.333 | 5.066 | 14.325 | 96.076      |

---

|                   |       |       |        |        |
|-------------------|-------|-------|--------|--------|
| MP2               | 9.259 | 4.960 | 14.086 | 96.243 |
| error             | 0.074 | 0.106 | 0.239  | 0.167  |
| error<br>ratio(%) | 0.799 | 2.137 | 1.700  | 0.174  |
